# Supplementary material for: Quantitative proteomics study of the neuroprotective effects of B12 on hydrogen peroxide-induced apoptosis in SH-SY5Y cells
Source: PubMed Central journal article supplement (PMC4782069; doi:10.1038/srep22635), 2016-03-08
Supplement: srep22635-s1.pdf [file srep22635-s1.pdf]

## Supplementary Information For:

### Quantitative proteomics study of the neuroprotective effects of B12 on hydrogen peroxide-induced apoptosis in SH-SY5Y cells

Lijun Zhong <sup>a,#</sup>, Juntuo Zhou <sup>b,#</sup>, Xi Chen <sup>a</sup>, Yaxin Lou <sup>a</sup>, Dan Liu <sup>a</sup>, Xiajuan Zou <sup>a</sup>, Bin Yang <sup>a</sup>, Yuxin Yin <sup>c,d,\*</sup>,  
Yan Pan <sup>e,\*</sup>

<sup>a</sup> *Medical and Health Analytical Center, Peking University Health Science Center, Beijing 100191, China*

<sup>b</sup> *Department of Pathology, School of Basic Medical Sciences, Peking University Health Science Center, Beijing 100191, China*

<sup>c</sup> *Institute of Systems Biomedicine, Department of Pathology, School of Basic Medical Sciences, Peking University Health Science Center, Beijing, 100191, China.*

<sup>d</sup> *Beijing Key Laboratory of Tumor Systems Biology, Beijing, 100191, China*

<sup>e</sup> *Department of Pharmacology, School of Basic Medical Sciences, Peking University Health Science Center, Beijing 100191, China*

*#Co-first authors, \*Co-corresponding authors*

Corresponding author:

Yan Pan

**Address:** *Department of Pharmacology, School of Basic Medical Sciences, Peking University Health Science Center, Beijing 100191, China*

**Tel.:** +86-10-82801890

**E-mail address:** [pannay26@bjmu.edu.cn](mailto:pannay26@bjmu.edu.cn)

# Supplementary figures and figure legends

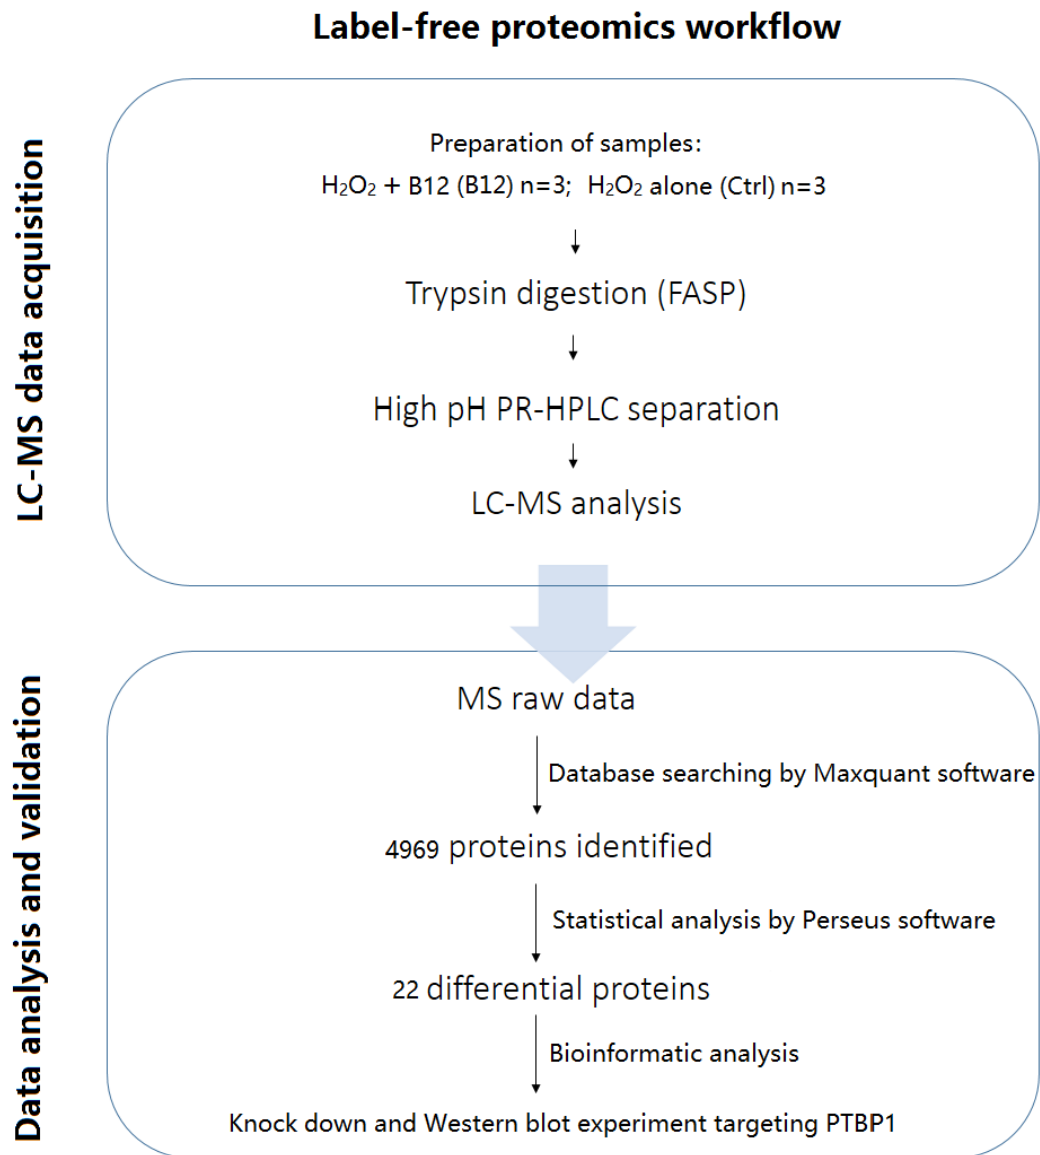

Figure S1 | . The workflow flowchart of the proteomic study.

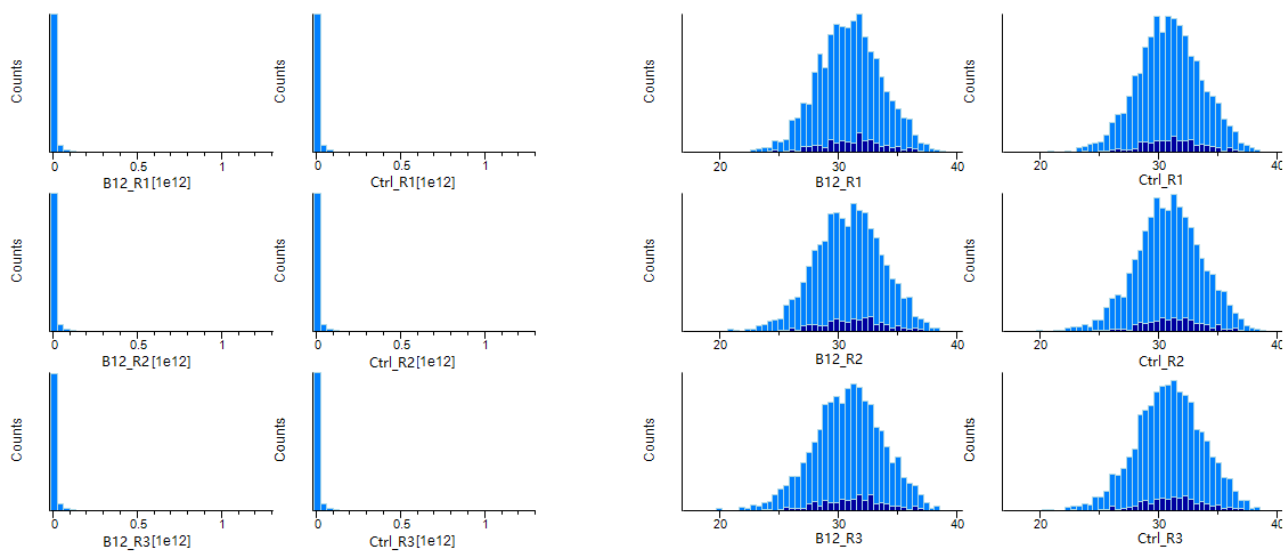

Figure S2 | Histograms of the LfQ intensity of proteins before (left) and after (right) a logarithm transformation (base 2). Blue represents total proteins identified in SH-SY5Y cells and dark blue represents proteins that had a t-test p-value less than 0.05 between the two groups (B12 and Ctrl group).

| List names                        | number of elements | number of unique elements |
|-----------------------------------|--------------------|---------------------------|
| Bioreplicate_1                    | 4215               | 4215                      |
| Bioreplicate_2                    | 4331               | 4331                      |
| Bioreplicate_3                    | 4546               | 4546                      |
| Overall number of unique elements |                    | 4958                      |

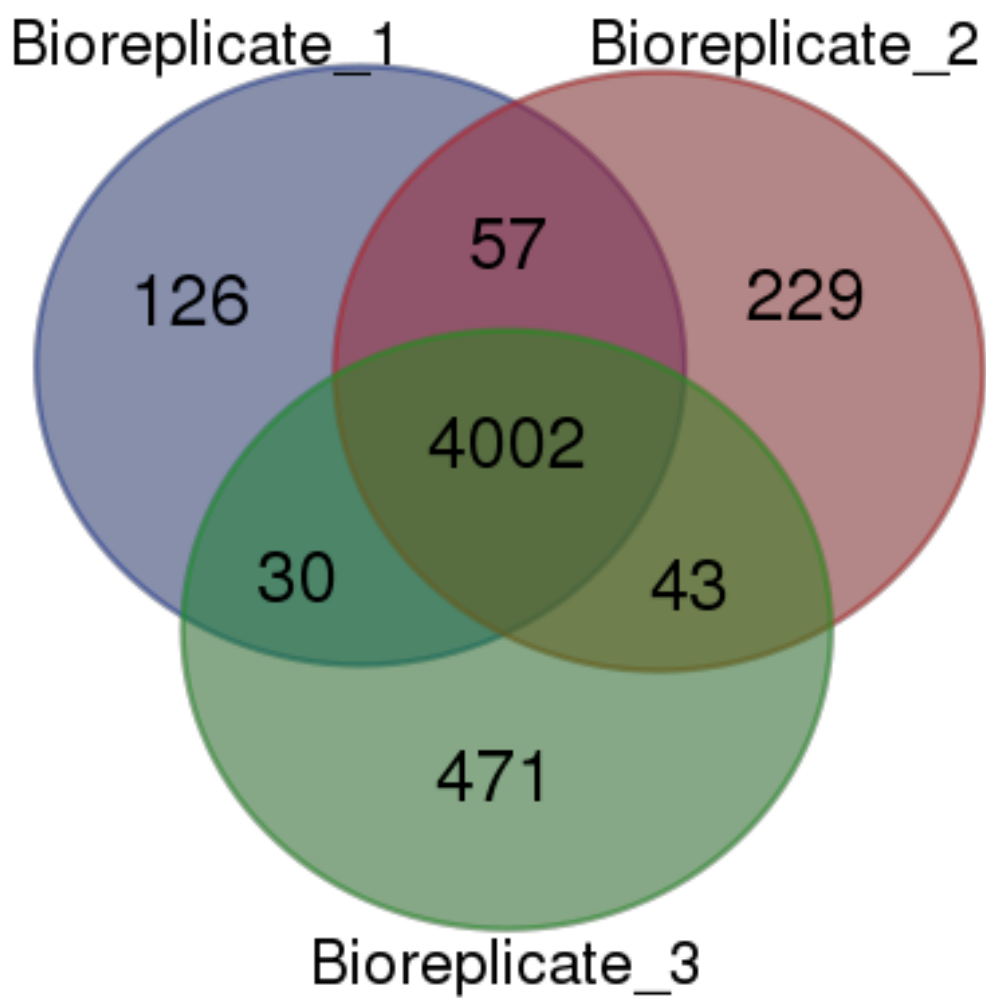

Figure S3 | Venn diagram of identified proteins in the three biological replicates.

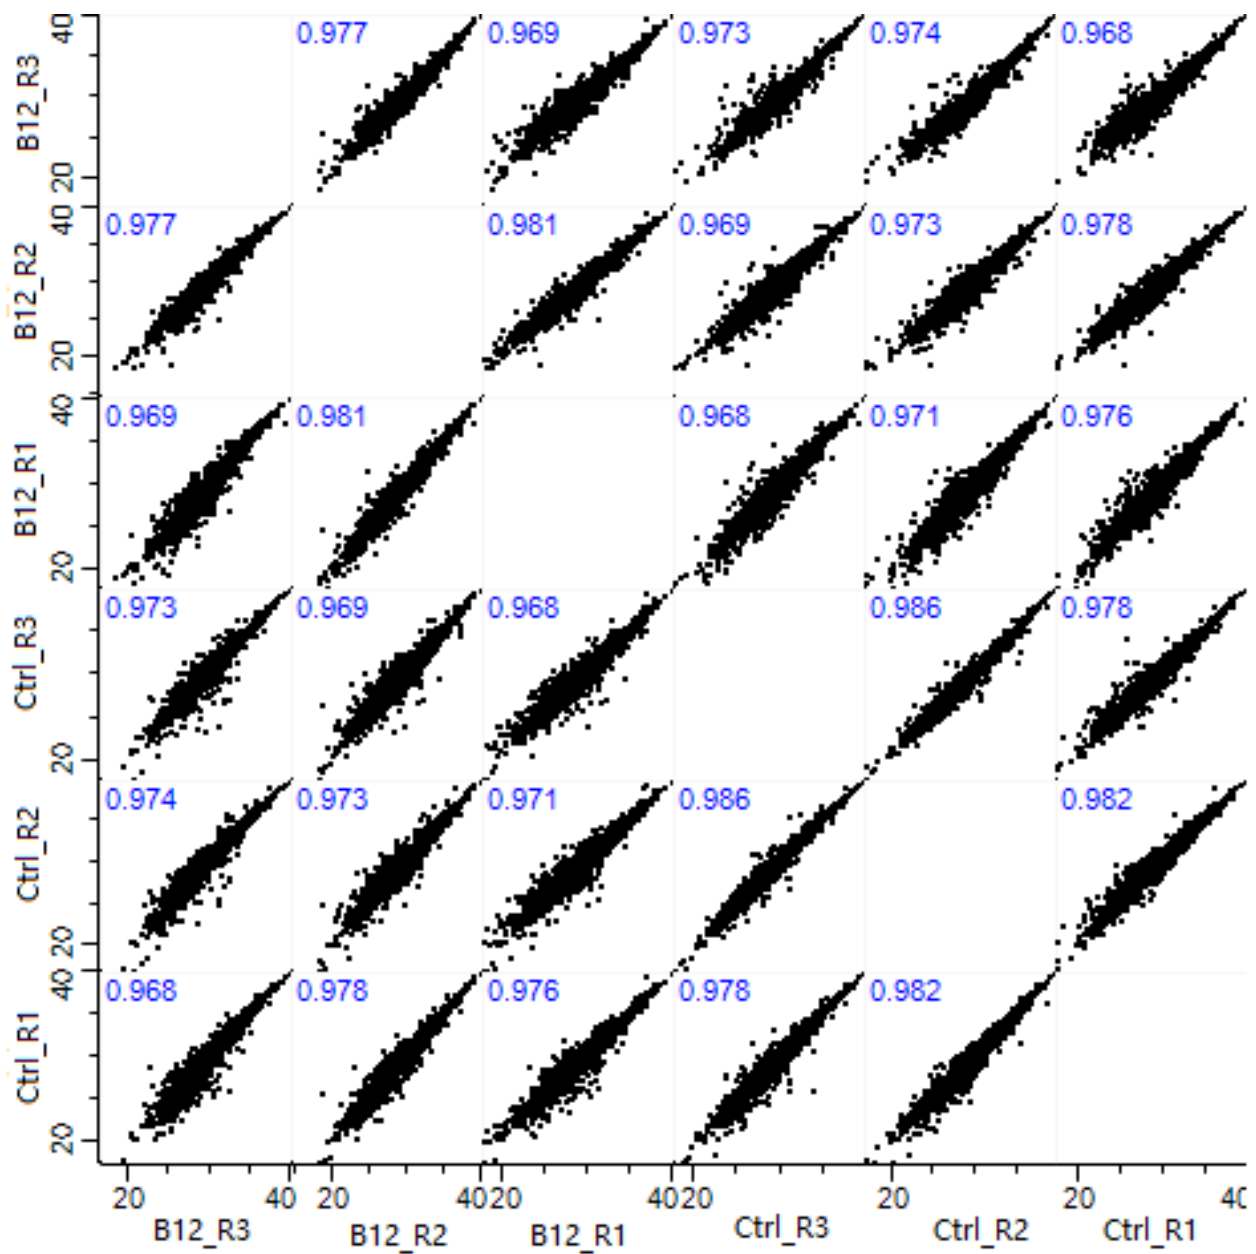

Figure S4 | Scatter plots of log<sub>2</sub> LFQ intensities of identified proteins of all samples. The number in plots was the Pearson correlation coefficient.
